# Supplementary material for: Competence for neural crest induction is controlled by hydrostatic pressure through Yap
Source: PubMed Central journal article supplement (PMC11021196; doi:10.1038/s41556-024-01378-y), 2024-03-18
Supplement: 41556_2024_1378_MOESM1_ESM.pdf [file 41556_2024_1378_MOESM1_ESM.pdf]

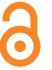

# Competence for neural crest induction is controlled by hydrostatic pressure through Yap

---

In the format provided by the authors and unedited

---

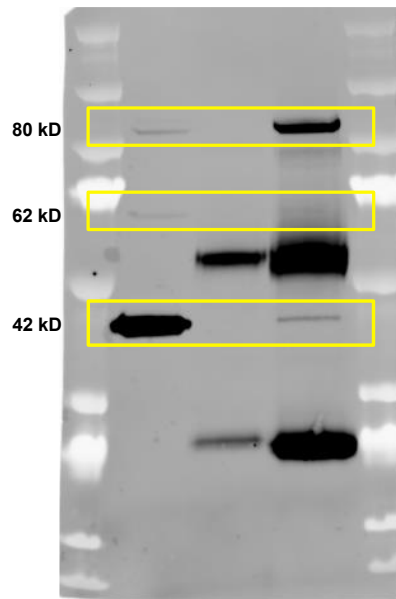

**Supplementary 1 | Yap and B-catenin interaction in induced neural crest cells.** Co-immunoprecipitation of induced neural crest cell lysate. Left side bands indicate input, and right side indicates positive band.
